# Supplementary material for: Concentration Trajectory Route of Air pollution with an Integrated Lagrangian model (C-TRAIL model v1.0) derived from the Community Multiscale Air Quality Modeling (CMAQ model v5.2)
Source: Copernicus journal article supplement (doi:10.5194/gmd-2019-366), 2020-01-24

## Response to reviewer #2

Authors appreciate reviewer's thoughtful comments and suggestions, which are greatly helpful for us to improve our manuscript. The manuscript has been revised to accommodate the reviewer's comments.

### General Comment:

**This paper introduces and demonstrates how C-TRAIL can be used to enhance the value existing back trajectories calculation techniques for understanding long range transport of trace gases. In addition to the meteorological information that is already included to compute the trajectory, C-TRAIL incorporates trace gas concentration changes throughout the path of the trajectory. The authors applied this technique for the KORUS-AQ time period and demonstrated its performance during various meteorological conditions. This new technique has the potential to be of high value for scientist evaluating long range transport, scientists involved in model development, and air quality regulators. This paper fits the criteria for publication in GMD, but some methodological issues need to be addressed before accepting for publication.**

### Major comments

**COMMENT) The authors make reference to “packets” starting on line 83 and the term is used throughout the paper. Is this considered to be a grid cell, a certain part of the concentration profile, the integrated profile or would the term air parcel be more appropriate? This should be clarified further because in some readers minds this term is unclear.**

**RESPONSE) Thanks for your comments. In Lagrangian format, we needed to work with particles rather than grid cells, and these particles were representative of air parcels. As their nature, however, differs from that of air parcels and they carry several species, we referred to them as “air packets.” Based on your concern, we modified the text to elaborate on the definition of “packets” as follows:**

Line 80-82: “From now on, we will call these “points” air packets, because (1) their nature is similar to air parcels, but they are much smaller in size, (2) they behave like particles, but they are carrying information for several species.”

**COMMENT) There is no mentioned about how well the meteorological model performs during the campaign period. Is there any previous work that compared surface and upper level winds to the model? During this campaign there were radiosondes launched (due to ozonesondes) that could provide some seamless validation of the model in the vertical and the usual stationary meteorological stations to verify the winds at least over land. I don't expect the authors to go ahead with a full scale meteorological validation, but I believe this is important to mention in more detail and include some references on the quality of wind outputs from WRF.**

**RESPONSE) Thanks for your suggestion. Following your suggestion, we did some validation for horizontal wind over surface. In addition, we downloaded Sondes data from the KORUS-AQ website and prepared some validation on the vertical profile of wind. We presented the results here and in the revised manuscript and added the plots to the supplement of the manuscript (Table S1-S2, Figure S1-S4).**

Line 140-142: “We validate our WRF model's wind predictions with surface measurements and radiosonde measurements for the KORUS-AQ period (see Table S1-S2 and Figure S1-S4).”

U and V validation based on surface stations (255 stations across South Korea):

|                        | <b>IOA</b> | <b>Correlation</b> | <b>RMSE</b> | <b>MAE</b> |
|------------------------|------------|--------------------|-------------|------------|
| <b>U wind velocity</b> | 0.7632     | 0.6927             | 2.1952      | 1.7536     |
| <b>V wind velocity</b> | 0.6922     | 0.5663             | 2.1924      | 1.7282     |

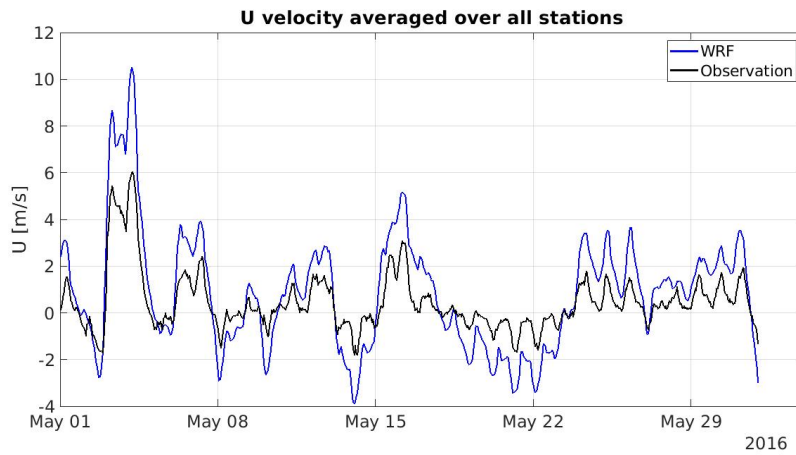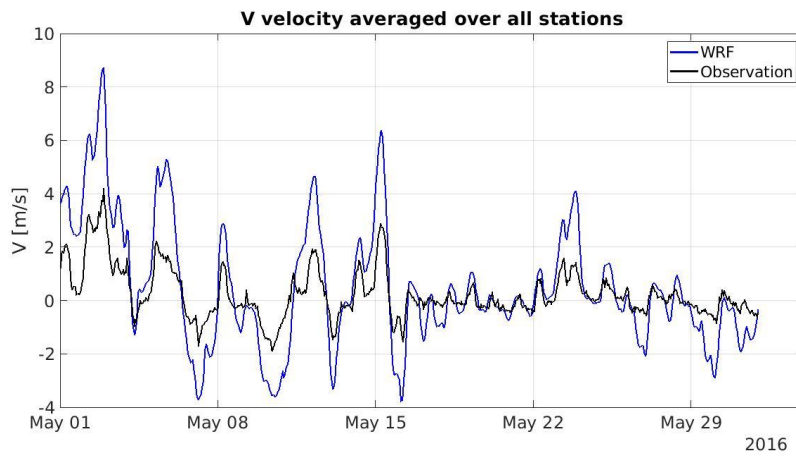

Radiosonde validation for wind speed and direction (82 observation point for hourly averaged sonde data):

|                       | <b>IOA</b> | <b>Correlation</b> | <b>RMSE</b> | <b>MAE</b> |
|-----------------------|------------|--------------------|-------------|------------|
| <b>Wind Speed</b>     | 0.8616     | 0.7642             | 6.5722      | 4.9589     |
| <b>Wind Direction</b> | 0.7341     | 0.6269             | 70.1072     | 49.2412    |

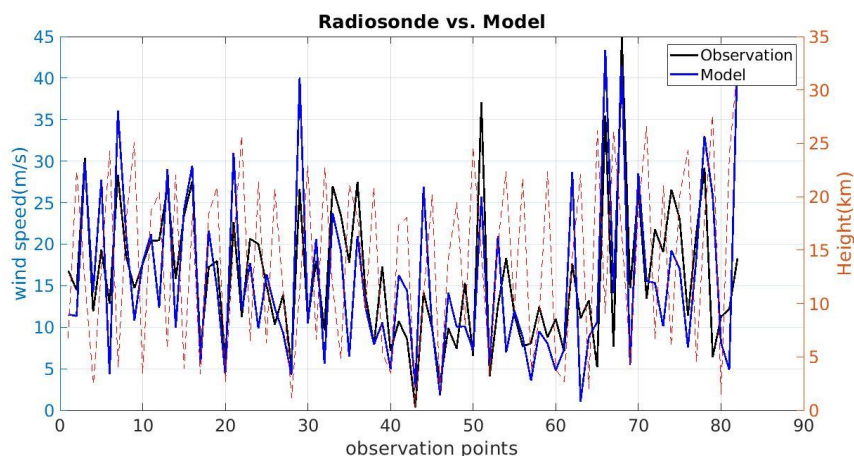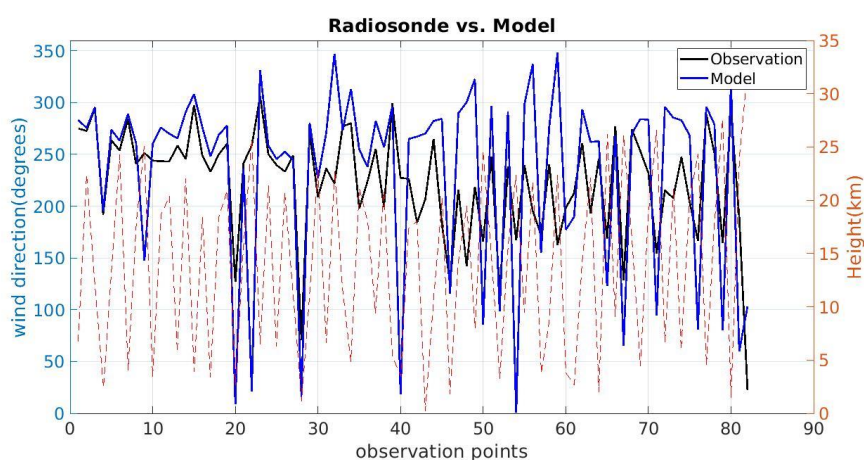

**COMMENT)** It is not clear what altitude these packets are arriving at over Seoul or if these packets started at various altitudes and descended to the surface via subsidence. This needs clarification considering this paper is discussing surface air quality impacts. This applies to lines 186-187, 21, and the discussion in lines 198-205.

**RESPONSE)** Thank you for your comment. The information regarding the altitude of these packets is provided in the color-bar of Figures 7-10 and extra box-plots in the supplementary document (Figure S8). We clarified your points in line 199-202 of the revised manuscript: “This section provides an example of how we use C-TRAIL to study the sources of different packets from different altitudes (from below 1 km to almost 10 km) over the Seoul Metropolitan Area (SMA); later sections will focus on the entire month of May 2016 C-TRAIL over the SMA and provide more comprehensive illustrations of the concentrations and altitudes of trajectories.”

**COMMENT)** Additionally, while understanding the concentration change along the trajectory is a notable accomplishment of this study, the altitude of these packets needs to be included somehow in Figure 6b.

**RESPONSE)** Thank you for your comment. We added a figure showing how the altitude of these four packets change on this day in the supplement (Figure S7).

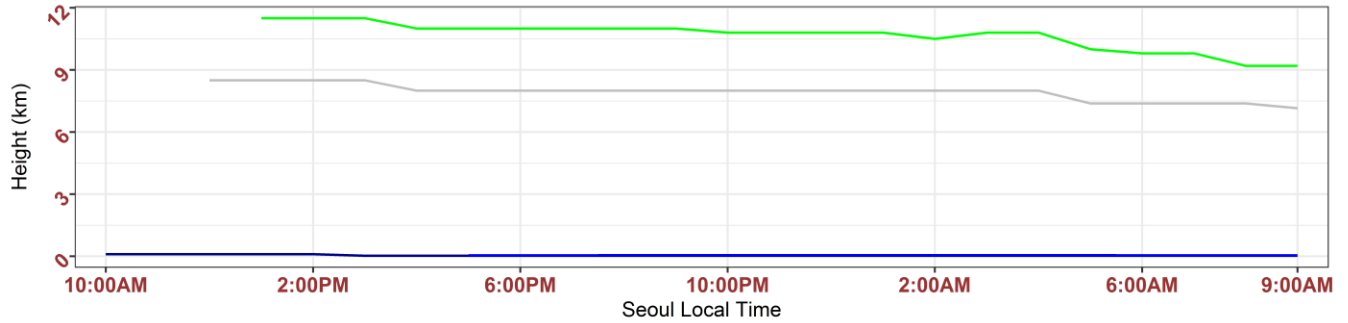

Figure S7: Changes in the height (km) of four aged packets moving toward Seoul from source points

Also, we have added altitude graphs in the supplement for Figures 7-10 (Figure S8).

**COMMENT) Lines 239-240: Wouldn't it be expected that almost all long distance packets would show lower concentrations because these are at higher altitudes, with stronger wind speeds, and not likely impacted from surface based CO sources? Are there convective processes considered in WRF that would transport surface CO at the altitudes considered here?**

**RESPONSE)** Thank you for raising this concern. Your assumption is valid, but some convective transport results from WRF convection, which could directly impact vertical wind and therefore the surface CO concentration. The impact, however, is not as great as that of horizontal transport. We addressed this concern in response to a comment by reviewer #1 below: Based on the CMAQ Science document, Chapter 11: "The resolved clouds have been simulated by the MM5 to cover the entire grid cell. No additional cloud dynamics are considered in CMAQ for this cloud type since any convection and/or mixing would have been resolved and considered in the vertical wind fields provided by MM5." Also, we checked WRF Kain-Fritsch Model: "..., momentum transport in convective clouds is crudely simulated by assuming conservation of momentum in convective clouds..."

$$\frac{\Delta \bar{u}}{\Delta t} \Big|_{conv} = \frac{1}{\Delta p} [(\omega_{u2} + \omega_{d2})\bar{u}_2 - (\omega_{u1} + \omega_{d1})\bar{u}_1 + (\epsilon_u + \epsilon_d)\bar{u}_m - \delta_u u_{um} - \delta_d u_{dm}]$$

$$\frac{\Delta \bar{v}}{\Delta t} \Big|_{conv} = \frac{1}{\Delta p} [(\omega_{v2} + \omega_{d2})\bar{v}_2 - (\omega_{v1} + \omega_{d1})\bar{v}_1 + (\epsilon_u + \epsilon_d)\bar{v}_m - \delta_u v_{um} - \delta_d v_{dm}]$$

TG advection in C-TRAIL solves the transport equation in three-dimensional format, therefore, the convective transport is already considered in vertical wind fields. Sub-grid cloud convection, however, will be considered in a future study.

**COMMENT) Line 254-255: Using the word "indisputable" is a strong statement and I believe needs some further justification.**

**RESPONSE)** Thank you for your comment. To clarify for readers, we changed the wordings of this sentence:

Line 272-273: "That is, the findings of this study regarding the trajectories and the origin of polluted air masses are similar to those of previous studies."

**COMMENT) Since this application of C-TRAIL is based on understanding CO at the surface, it is important to know how well the modeled CO is relative to the surface measurements of CO. The**

model comparison to aircraft measurements gives an overview of the performance at numerous altitudes. However, since many of the high concentration CO packets remain close to the surface throughout their trajectory, it would be ideal to see how well the model performed when compared against surface monitor data.

**RESPONSE)** Thank you for your comment. Since the data available for CO measurement over the surface has high uncertainties ( $\pm 100$  ppbv), we did a brief validation for 25 stations over South Korea. Another major issue is the underprediction of the model due to the high uncertainty in emission inventory over East Asia that has been discussed in several previous papers. Since this paper is proposing a new diagnostic tool based on CMAQ, as you mentioned, it is more valuable if it could be applied over a region with a CMAQ model with high performance. Anyhow, below you can find CO surface measurements validation. We also added this result into supplementary document (Table S3, Figure S5)

|                  | IOA    | Correlation | RMSE   | MAE    |
|------------------|--------|-------------|--------|--------|
| CO concentration | 0.4932 | 0.3128      | 199.85 | 168.02 |

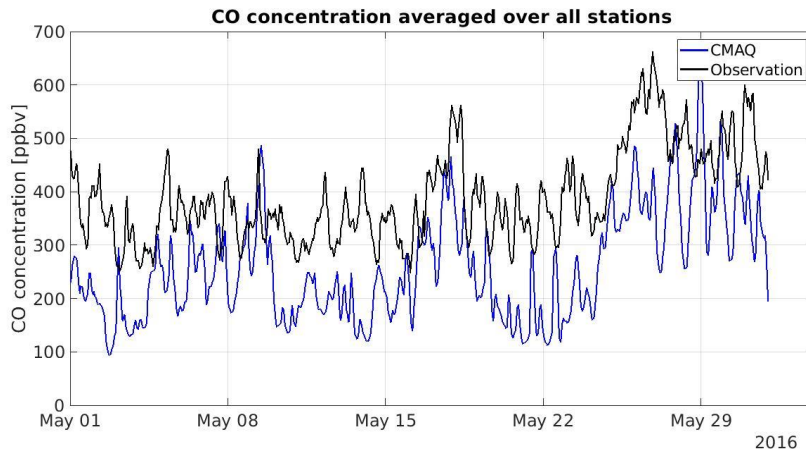

In the future study, we will apply some data assimilation techniques and artificial intelligence bias correction methods to improve the CMAQ results over this region. We also revised the manuscript for mentioning this issue:

Line 157-160: “We also provided CMAQ’s CO comparison with surface stations measurements in the supplementary document (see Table S3 and Figure S5). The results of this comparison also show the model’s underprediction, which is caused by uncertain emission inventories over East Asia.”

#### Minor comments

**COMMENT)** There are some grammar issues that should be addressed in this paper. There were a few instances of present tense being used in combination with past tense and some sentences that should be restructured to better communicated the science presented in this paper. I suggest the authors give this a few reads to increase all the grammatical issues.

**RESPONSE)** Thank you for sharing your concern. We have proofread the manuscript several times and changed some wording because of grammatical issues in the text. You will see these changes in the revised draft of the manuscript.

**COMMENT) Line 63-66: In this sentence, it is not clear why the amount of pollution in an airmass would affect the reliability of the meteorology used in the trajectory calculation.**

**RESPONSE)** Thank you for your comment. As you stated, the sentence was vague, so we rephrased it as follows:

Line 66-68: “One significant outcome of the TG model applied to CTMs is its ability to account for the concentrations of pollutants in air masses in its investigation of trajectories, which addresses the unreliability of meteorology-based Lagrangian models when the pollutedness or cleanliness of an originated air mass becomes an issue.”

**COMMENT) Line 138: A couple references to those papers would be ideal to include**

**RESPONSE)** Thanks for your comment. The following references are some that we added to the revised manuscript:

Line 146-147: “In papers pertaining to this campaign, several studies (Al-Saadi et al., 2016; Choi et al., 2019; Miyazaki et al., 2019) separated the time frame into three periods (Table 1)”

**COMMENT) Figure 4: the number of data points (n=##) should be included with these plots, especially to underscore the contrast between the number of samples for each of these conditions. This is especially relevant to the statement made on 148, where the highest correlation was found with the meteorological set up that had the least number of data points.**

**RESPONSE)** Thank you for pointing out this thoughtful point. As you mentioned, we added the number of data points in the caption of the plot.

Entire May 2016: n=6865

DWP: n=1750

SP: n=1548

EPP: n=264

**COMMENT) Line 158-159: It is not clear what point is being conveyed in this sentence. Isn't the sensitivity of CO source regions relevant for all conditions?**

**RESPONSE)** Thank you for your comment. Here, we have stated that the vertical velocities associated with convection could have significantly impacted transport for DWP period (which consisted of rainy and cloudy days). To convey this point, we rephrased our sentence as follows:

Line 169-170: “Also, in light of the impact of convection, the concentrations of CO over Korea could have increased or decreased by vertical wind transport and cloud updrafts and downdrafts.”

**COMMENT) Line 162: I would suggest the complexity of the model is increased under stagnant conditions due to the lack of dispersion and one is further relying on getting the chemistry right in the model. Please comment on this.**

**RESPONSE)** Thank you for this thoughtful suggestion. We agree with the reviewer and revised our sentences as follows:

Line 173-176: “Even though one might assume that the model would produce more accurate simulations with less convection-related transport, CO concentrations were significantly underestimated by the model

(Jeon et al., 2016) because of uncertainties in the chemistry modeling and the faulty emission inventories over East Asia.”

**COMMENT) Figure 7-10:** The plots in (b) and (c) should be expanded vertically and with x and y grids added to better see the changes in concentrations and distances. In some instances it is difficult to see the increases or decreases mentioned in the discussion. Specifically in Figure 9, since most of the packets do not extend over a large distance, it would be helpful to have a more zoomed in map projection to show the detail in the path of these packets. This suggestion applies for the other figures (7-10). Additionally, if each of these packets that start at an altitude higher than the surface do indeed end up descending to the surface, another plot with the zoomed in domain over South Korea would be helpful for further understanding how these packets closer to the receptor site. Additionally, there are no units mentioned for the altitude colorbar in figures 7-10. While the highlight of this paper is the role of LRT of pollution from China on Seoul air quality, it would be helpful to have a zoomed in view of just South Korea to see the variability of surface packets.

**RESPONSE)** Thanks. We addressed all of your concerns regarding Figures 7-10. We revised the plots and added a zoomed map over South Korea for each period. You can find the revised Figure 7 below:

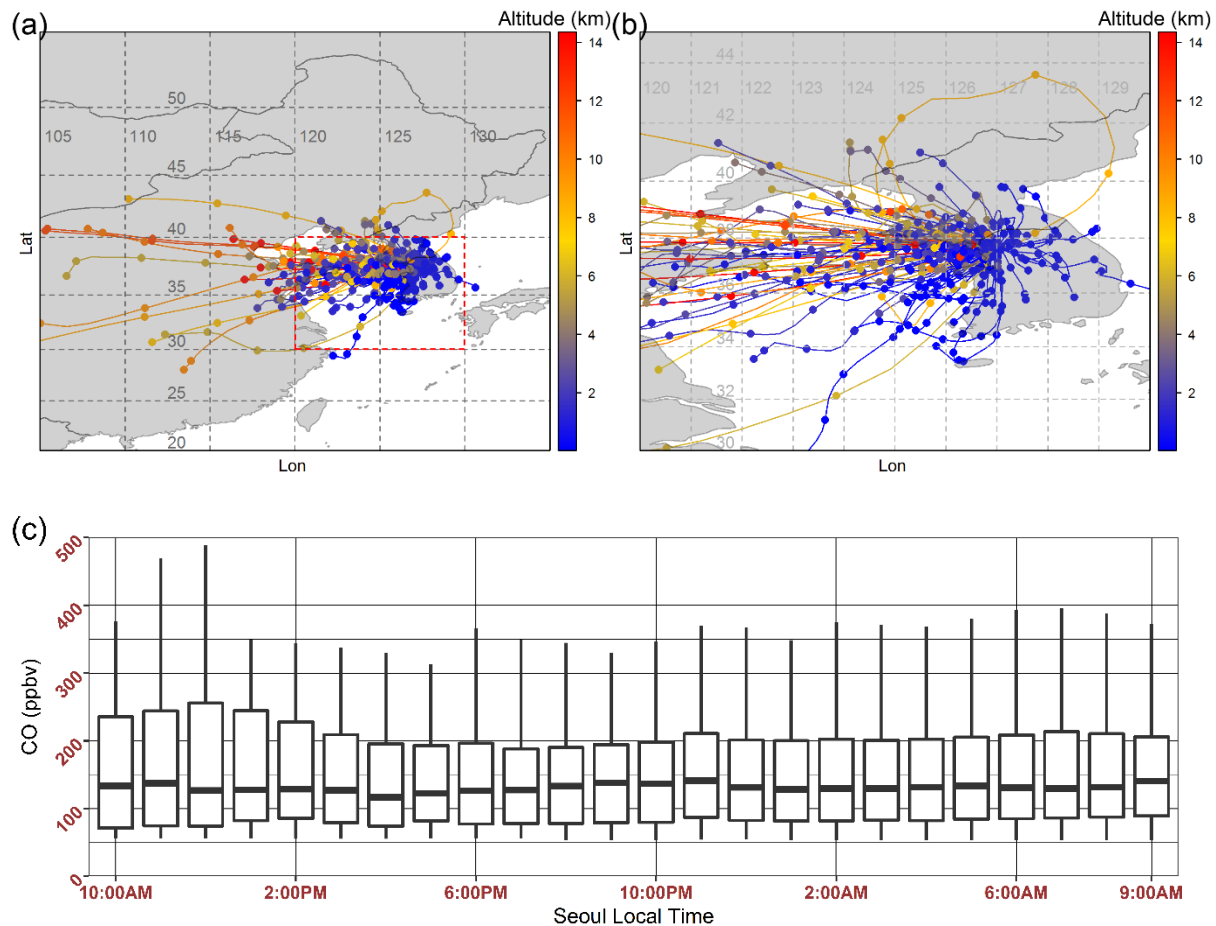

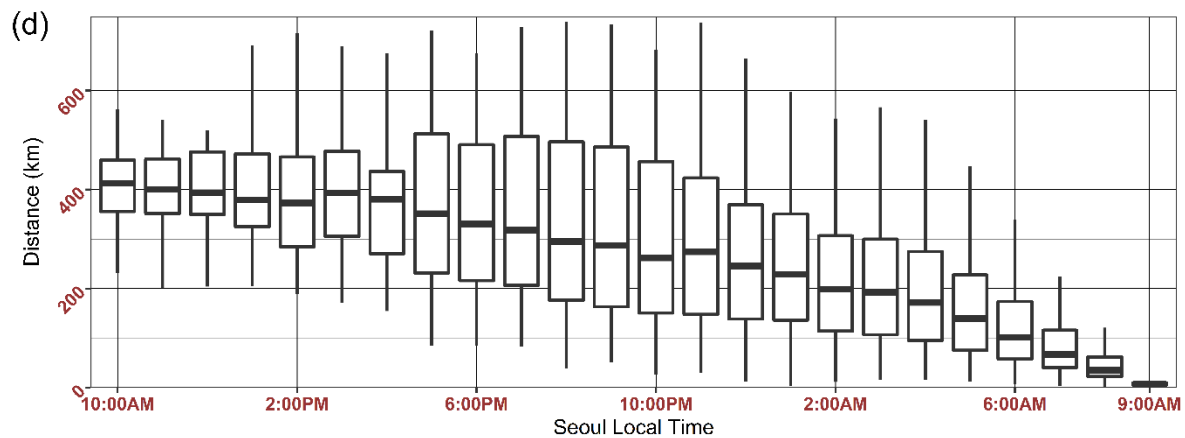

Figure 1: C-TRAIL output for the entire month of May 2016 for Seoul as the receptor: (a) 24-hour trajectories of packets for the entire domain, (b) 24-hour trajectories of packets for the zoomed area in South Korea, (c) boxplot of the CO concentrations of all packets at each hour before they reached Seoul, and (d) the boxplot of packet distances from Seoul every hour before the packets reached Seoul

**COMMENT) Line 248: The text says Figure 9, but this should be Figure 10.**

**RESPONSE)** Thank you, Revised.

**COMMENT) Figure 12a and 12b: Why are some of the clusters partially colored or not colored at all? Visually, it would be ideal to have all of them colored so it is obvious which cluster is which.**

**RESPONSE)** Thanks. Revised.

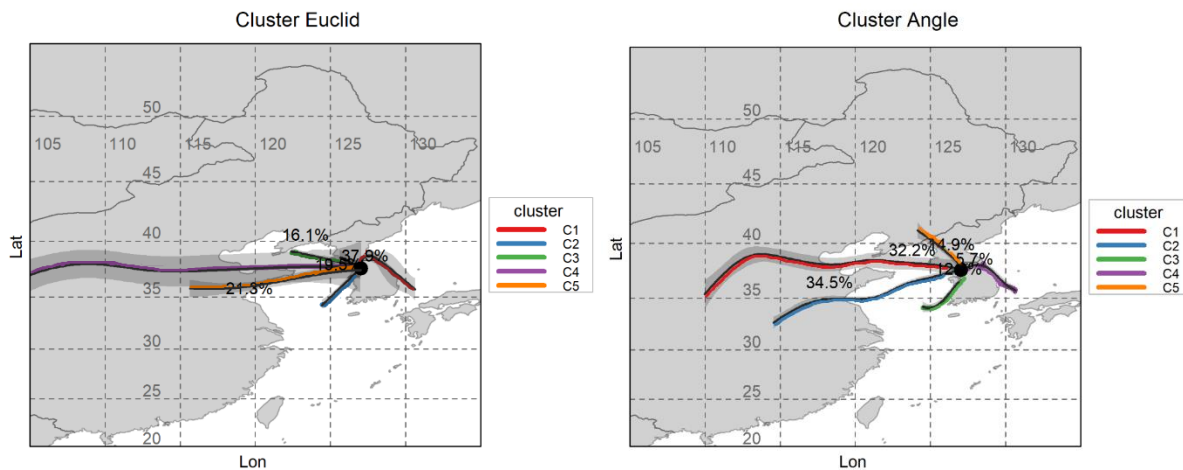

Supplement: Supplementary file [file gmd-2019-366-AC2-supplement.pdf]
