# Supplementary material for: Concentration Trajectory Route of Air pollution with an Integrated Lagrangian model (C-TRAIL model v1.0) derived from the Community Multiscale Air Quality Modeling (CMAQ model v5.2)
Source: Copernicus journal article supplement (doi:10.5194/gmd-2019-366), 2020-01-24
Supplement: Supplementary file 1 [file gmd-2019-366-supplement.pdf]

NOAA HYSPLIT MODEL  
 Backward trajectories ending at 2300 UTC 04 Jun 16  
 GFSG Meteorological Data

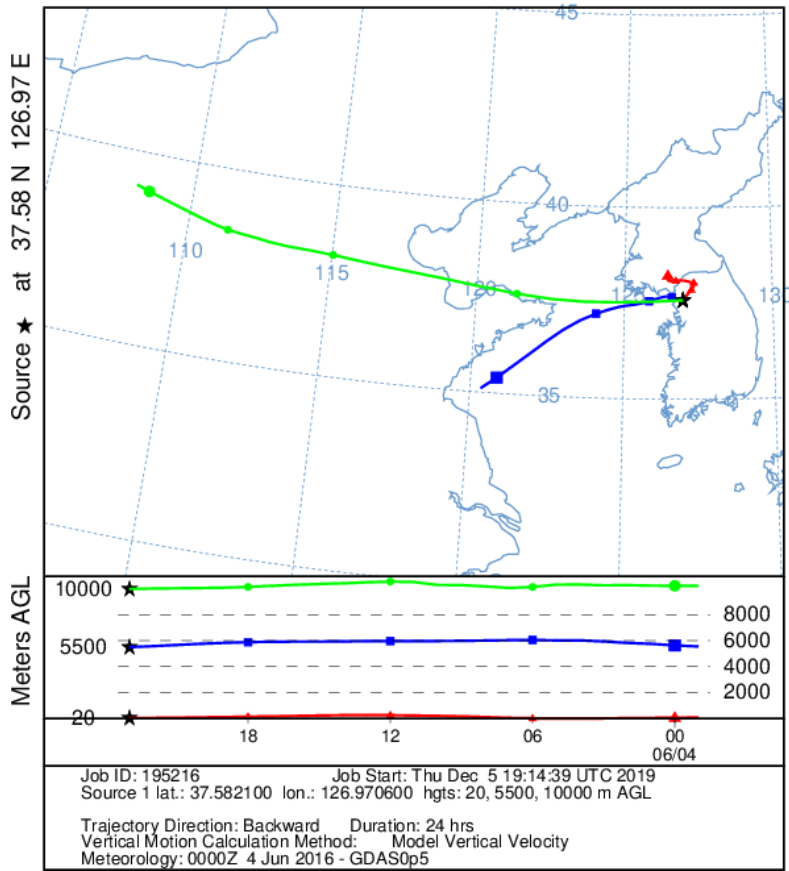

Figure S1: HYSPLIT back-trajectory output for June 4, 2016 from three different heights similar to packets.

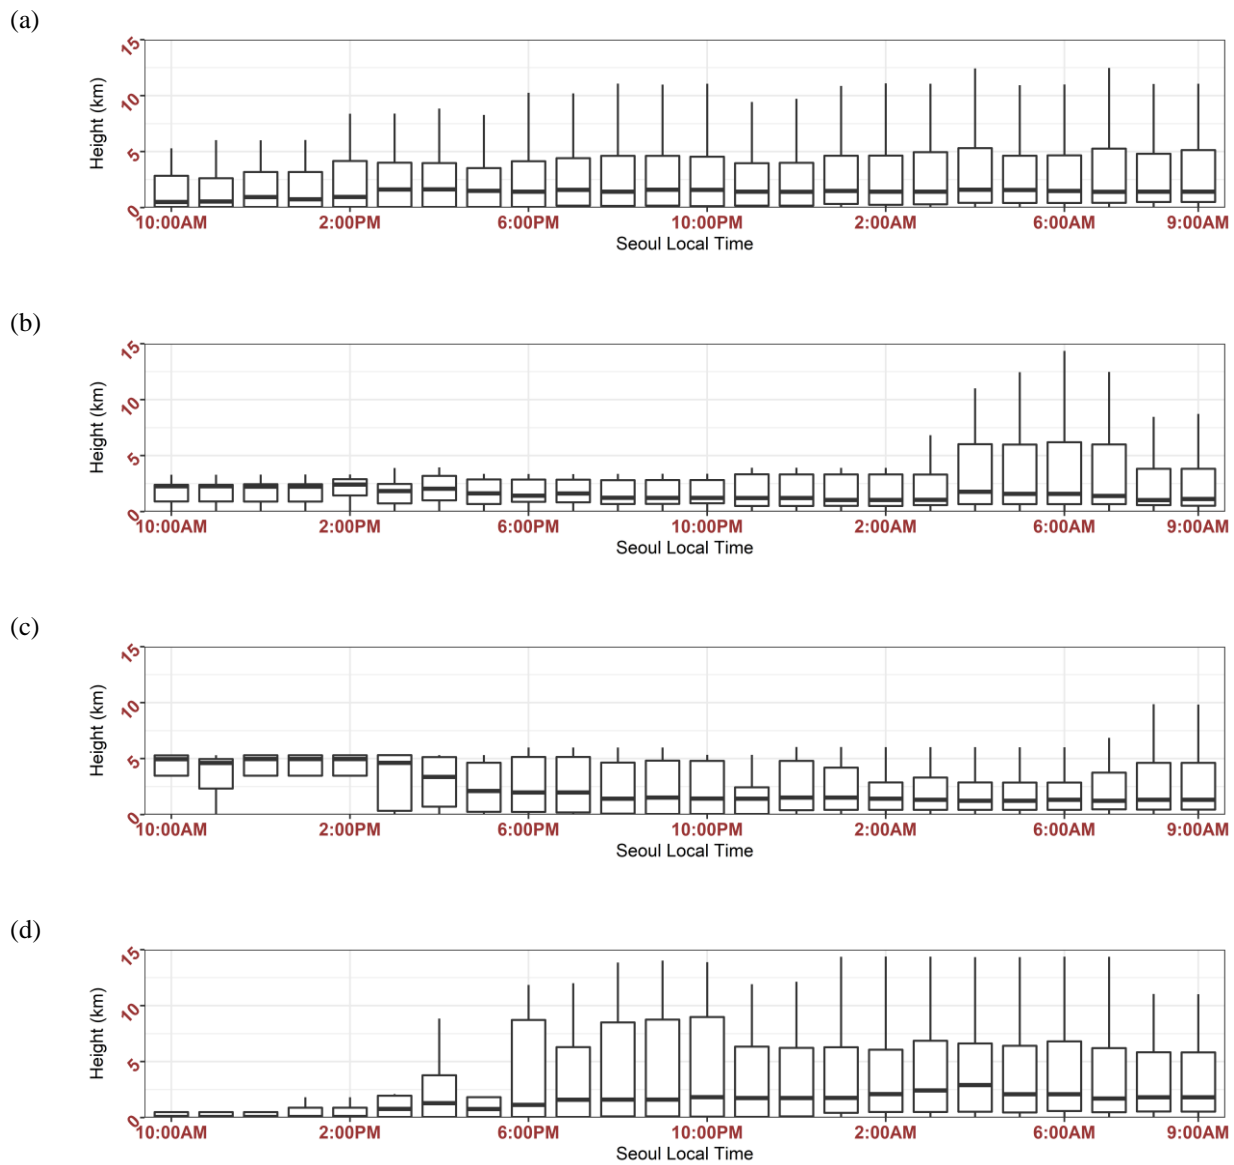

10 **Figure S2. Boxplot outputs of Heights of C-TRAIL outputs for different periods of May 2016, (a) the entire month of May 2016 (b) Dynamic weather period (DWP) (c) Stagnant period (SP) (d) Extreme pollution period (EPP)**
